# Supplementary material for: Cost-Effectiveness Analysis of Sofosbuvir Compared to Current Standard Treatment in Swiss Patients with Chronic Hepatitis C
Source: PubMed Central journal article supplement (PMC4431849; doi:10.1371/journal.pone.0126984), 2015-05-14
Supplement: pone.0126984.s002.pdf [file pone.0126984.s002.pdf]

BOC, boceprevir; C, cirrhotic; HBV, hepatitis B virus; HCV, hepatitis C virus; HIV, human immunodeficiency virus; MRI, magnetic resonance imaging; NC, non-cirrhotic; PegIFN, pegylated interferon; RBV, ribavirin; RNA, ribonucleic acid; SOF, sofosbuvir; SVR, sustained virological response; TEL, telaprevir

\*resource use was checked by Swiss clinical experts; 1 stands for 100% of the patients
